# Supplementary material for: Decoding the epigenetics and chromatin loop dynamics of androgen receptor-mediated transcription
Source: PubMed Central journal article supplement (PMC11532539; doi:10.1038/s41467-024-53758-5), 2024-11-03
Supplement: 41467_2024_53758_MOESM3_ESM.pdf [file 41467_2024_53758_MOESM3_ESM.pdf]

## **Description of Additional Supplementary Files**

**File Name:** Supplementary Data 1

**Description:** The sequences of gRNAs and qRT-PCR primers for CRISPRi.

**File Name:** Supplementary Data 2

**Description:** The coordinates of gRNAs and qRT-PCR primers for CRISPRi. All coordinates are in hg19.

**File Name:** Supplementary Data 3

**Description:** Neighbors of androgen response genes and their dominance status (0m, 30m, 4h, 16h, 72h). All coordinates are in hg19.

**File Name:** Supplementary Data 4

**Description:** Neighbors of all genes and their dominance status with prostate cancer variation status (PMID: 37945903). All coordinates are in hg19.
