# Supplementary material for: Decoding the epigenetics and chromatin loop dynamics of androgen receptor-mediated transcription
Source: PubMed Central journal article supplement (PMC11532539; doi:10.1038/s41467-024-53758-5), 2024-11-03
Supplement: 41467_2024_53758_MOESM8_ESM.pdf [file 41467_2024_53758_MOESM8_ESM.pdf]

Corresponding author(s): Nathan LackLast updated by author(s): 09/26/2024

## Reporting Summary

Nature Portfolio wishes to improve the reproducibility of the work that we publish. This form provides structure for consistency and transparency in reporting. For further information on Nature Portfolio policies, see our [Editorial Policies](#) and the [Editorial Policy Checklist](#).

### Statistics

For all statistical analyses, confirm that the following items are present in the figure legend, table legend, main text, or Methods section.

n/a Confirmed

- The exact sample size ( $n$ ) for each experimental group/condition, given as a discrete number and unit of measurement
- A statement on whether measurements were taken from distinct samples or whether the same sample was measured repeatedly
- The statistical test(s) used AND whether they are one- or two-sided  
*Only common tests should be described solely by name; describe more complex techniques in the Methods section.*
- A description of all covariates tested
- A description of any assumptions or corrections, such as tests of normality and adjustment for multiple comparisons
- A full description of the statistical parameters including central tendency (e.g. means) or other basic estimates (e.g. regression coefficient) AND variation (e.g. standard deviation) or associated estimates of uncertainty (e.g. confidence intervals)
- For null hypothesis testing, the test statistic (e.g.  $F$ ,  $t$ ,  $r$ ) with confidence intervals, effect sizes, degrees of freedom and  $P$  value noted  
*Give  $P$  values as exact values whenever suitable.*
- For Bayesian analysis, information on the choice of priors and Markov chain Monte Carlo settings
- For hierarchical and complex designs, identification of the appropriate level for tests and full reporting of outcomes
- Estimates of effect sizes (e.g. Cohen's  $d$ , Pearson's  $r$ ), indicating how they were calculated

*Our web collection on [statistics for biologists](#) contains articles on many of the points above.*

### Software and code

Policy information about [availability of computer code](#)

Data collection

No software was used for data collection.

Data analysis

Programming Languages:  
Python (v3.9.7)  
R (v4.1.1)

Data Processing:  
- RNAseq:  
STAR (v2.7.9)  
Salmon (v0.14.1)  
VIPER (<https://github.com/hanfeisun/viper-rnaseq>)  
- ChIPseq & ATACseq:  
ChiLin (<https://github.com/cfce/chilin>)  
FastQC (v0.10.1)  
BWA (v0.7.10)  
MACS2 (v2.1.0.20140616)  
bedGraphToBigWig (<https://hgdownload.cse.ucsc.edu/admin/exe/>)  
Trim Galore (v0.5.0)  
- HiChIP:

HiC-Pro (v3.1.0)  
FitHiChIP (v10.0)

Data Analyses:

Bedtools (v2.30.0) - command-line  
numpy (v1.21.6) - python  
pandas (v1.5.3) - python  
scipy (v1.10.0) - python  
matplotlib (v3.6.2) - python  
seaborn (v0.13.1) - python  
pybedtools (v0.8.2) - python  
pyBigWig (v0.3.18) - python  
NetworkX (v3.1) - python  
Cooler (v0.9.3) - python  
GenomicInteractions (v1.34) - R

Code Availability:

The code to reproduce the results from this study's data is available through the project's source code repository [<https://github.com/birkiy/cisregulatorynetworks.git>] and [<https://github.com/birkiy/bluegill.git>].

For manuscripts utilizing custom algorithms or software that are central to the research but not yet described in published literature, software must be made available to editors and reviewers. We strongly encourage code deposition in a community repository (e.g. GitHub). See the Nature Portfolio [guidelines for submitting code & software](#) for further information.

## Data

Policy information about [availability of data](#)

All manuscripts must include a [data availability statement](#). This statement should provide the following information, where applicable:

- Accession codes, unique identifiers, or web links for publicly available datasets
- A description of any restrictions on data availability
- For clinical datasets or third party data, please ensure that the statement adheres to our [policy](#)

The generated datasets are deposited to Gene Expression Omnibus (GEO), and are publicly available through GSE251898 [<https://www.ncbi.nlm.nih.gov/geo/query/acc.cgi?acc=GSE251898>] accession (ATAC-seq: GSE251893, ChIP-seq: GSE251894, HiChIP: GSE251895, RNA-seq: GSE251896, Start-seq: GSE251897). Additional data are provided with this paper through zenodo [<https://zenodo.org/doi/10.5281/zenodo.13770484>]. Source data are provided.

## Research involving human participants, their data, or biological material

Policy information about studies with [human participants or human data](#). See also policy information about [sex, gender \(identity/presentation\), and sexual orientation](#) and [race, ethnicity and racism](#).

Reporting on sex and gender

This study does not include human participants.

Reporting on race, ethnicity, or other socially relevant groupings

This study does not include human participants.

Population characteristics

This study does not include human participants.

Recruitment

This study does not include human participants.

Ethics oversight

This study does not include human participants.

Note that full information on the approval of the study protocol must also be provided in the manuscript.

## Field-specific reporting

Please select the one below that is the best fit for your research. If you are not sure, read the appropriate sections before making your selection.

Life sciences  Behavioural & social sciences  Ecological, evolutionary & environmental sciences

For a reference copy of the document with all sections, see [nature.com/documents/nr-reporting-summary-flat.pdf](https://www.nature.com/documents/nr-reporting-summary-flat.pdf)

## Life sciences study design

All studies must disclose on these points even when the disclosure is negative.

Sample size

Sample sizes vary from assay to assay in this study. For ATAC-seq, H3K27ac ChIP-seq, H3K27ac HiChIP, RNA-seq and START-seq 2 replicates were used for every 5 time points. For AR, FOXA1, H3K4me3 ChIP-seq and H3K4me3 HiChIP 1 replicate was used for every 5 time points. In

total 75 experiments were performed.

The following quality metrics were assessed for each sample: (i) percentage of uniquely mapped reads, (ii) PCR bottleneck coefficient to identify potential over-amplification by PCR, (iii) FRiP (fraction of non-mitochondrial reads in peak regions), (iv) peak number, (v) number of peaks with 10-fold and 20-fold enrichment over the background, (vi) fragment size, (vii) the percentage of the merged peaks with promoter, enhancer, intron, or intergenic, and (viii) peak overlap with DNaseI hypersensitivity sites. For datasets with replicates, the replicate consistency was checked by two metrics: 1. Pearson correlation of reads across the genome using UCSC software wigCorrelate after normalizing signal to reads per million and 2. percentage of overlapping peaks in the replicates.

CRISPRi experiments 3 biological replicates were used.

Data exclusions

No data were excluded in the study.

Replication

For the omics data, replication is not applicable to in silico experiments in this study as the computed results are exact.

For the CRISPRi experiments, the standard deviation of biological replicates were given (Supp. Fig. 9B).

Randomization

This study generated data from a well studied cell-line. Therefore, randomization procedure was not relevant.

Blinding

This study generated data from a well studied cell-line. Therefore, blinding procedure was not relevant.

## Reporting for specific materials, systems and methods

We require information from authors about some types of materials, experimental systems and methods used in many studies. Here, indicate whether each material, system or method listed is relevant to your study. If you are not sure if a list item applies to your research, read the appropriate section before selecting a response.

### Materials & experimental systems

- |     |                                     |                               |
|-----|-------------------------------------|-------------------------------|
| n/a | <input type="checkbox"/>            | Involved in the study         |
|     | <input checked="" type="checkbox"/> | Antibodies                    |
|     | <input checked="" type="checkbox"/> | Eukaryotic cell lines         |
|     | <input checked="" type="checkbox"/> | Palaeontology and archaeology |
|     | <input checked="" type="checkbox"/> | Animals and other organisms   |
|     | <input checked="" type="checkbox"/> | Clinical data                 |
|     | <input checked="" type="checkbox"/> | Dual use research of concern  |
|     | <input checked="" type="checkbox"/> | Plants                        |

### Methods

- |     |                                     |                        |
|-----|-------------------------------------|------------------------|
| n/a | <input type="checkbox"/>            | Involved in the study  |
|     | <input checked="" type="checkbox"/> | ChIP-seq               |
|     | <input checked="" type="checkbox"/> | Flow cytometry         |
|     | <input checked="" type="checkbox"/> | MRI-based neuroimaging |

## Antibodies

Antibodies used

Antibodies used for both ChIP-seq and HiChIP: Anti-Androgen Receptor antibody (0.1 µg/µL, Abcam, ab133273), Anti-FOXA1 antibody (1 µg/µL, Abcam, ab23738), Anti-H3K27ac antibody (2.8 µg/µL, Diagenode, C15410196), Anti-H3K4me3 antibody (1.3 µg/µL, Diagenode, C15410003).

Validation

Each company validated the antibodies using various methods, including dot plot, ChIP qPCR, Western blot, immuno-fluorescence, immunocytochemistry, and immunohistochemistry. Supplier-provided assay results and validation reports are available on the vendor's website.

## Eukaryotic cell lines

Policy information about [cell lines and Sex and Gender in Research](#)

Cell line source(s)

LNCaP cells (#CRL-1740, ATCC)

Authentication

LNCaP cells were authenticated by sequencing and comparing short tandem repeats to parental LNCaP cells in ATCC database.

Mycoplasma contamination

Cells are routinely tested for Mycoplasma contamination. All tests were negative.

Commonly misidentified lines  
(See [ICLAC](#) register)

LNCaP is not listed as being commonly misidentified.

## Plants

Seed stocks

No plant species were used.

Novel plant genotypes

No plant species were used.

Authentication

No plant species were used.

## ChIP-seq

### Data deposition

- Confirm that both raw and final processed data have been deposited in a public database such as [GEO](#).
- Confirm that you have deposited or provided access to graph files (e.g. BED files) for the called peaks.

Data access links

*May remain private before publication.*<https://www.ncbi.nlm.nih.gov/geo/query/acc.cgi?acc=GSE251898>

Files in database submission

GSM7989602 LNCaP\_AR\_0m\_ChIPseq  
 GSM7989603 LNCaP\_AR\_30m\_ChIPseq  
 GSM7989604 LNCaP\_AR\_4h\_ChIPseq  
 GSM7989605 LNCaP\_AR\_16h\_ChIPseq  
 GSM7989606 LNCaP\_AR\_72h\_ChIPseq  
 GSM7989607 LNCaP\_FOXA1\_0m\_ChIPseq  
 GSM7989608 LNCaP\_FOXA1\_30m\_ChIPseq  
 GSM7989609 LNCaP\_FOXA1\_4h\_ChIPseq  
 GSM7989610 LNCaP\_FOXA1\_16h\_ChIPseq  
 GSM7989611 LNCaP\_FOXA1\_72h\_ChIPseq  
 GSM7989612 LNCaP\_H3K27ac\_0m\_rep1\_ChIPseq  
 GSM7989613 LNCaP\_H3K27ac\_0m\_rep2\_ChIPseq  
 GSM7989614 LNCaP\_H3K27ac\_30m\_rep1\_ChIPseq  
 GSM7989615 LNCaP\_H3K27ac\_30m\_rep2\_ChIPseq  
 GSM7989616 LNCaP\_H3K27ac\_4h\_rep1\_ChIPseq  
 GSM7989617 LNCaP\_H3K27ac\_4h\_rep2\_ChIPseq  
 GSM7989618 LNCaP\_H3K27ac\_16h\_rep1\_ChIPseq  
 GSM7989619 LNCaP\_H3K27ac\_16h\_rep2\_ChIPseq  
 GSM7989620 LNCaP\_H3K27ac\_72h\_rep1\_ChIPseq  
 GSM7989621 LNCaP\_H3K27ac\_72h\_rep2\_ChIPseq  
 GSM7989622 LNCaP\_H3K4me3\_0m\_ChIPseq  
 GSM7989623 LNCaP\_H3K4me3\_30m\_ChIPseq  
 GSM7989624 LNCaP\_H3K4me3\_4h\_ChIPseq  
 GSM7989625 LNCaP\_H3K4me3\_16h\_ChIPseq  
 GSM7989626 LNCaP\_H3K4me3\_72h\_ChIPseq  
 GSM7989627 LNCaP\_INPUT\_0m\_ChIPseq  
 GSM7989628 LNCaP\_INPUT\_30m\_ChIPseq  
 GSM7989629 LNCaP\_INPUT\_4h\_ChIPseq  
 GSM7989630 LNCaP\_INPUT\_16h\_ChIPseq  
 GSM7989631 LNCaP\_INPUT\_72h\_ChIPseq

Genome browser session

*(e.g. [UCSC](#))*

Not applicable

### Methodology

Replicates

For H3K27ac, 2 replicates were used; for AR, FOXA1, H3K4me3 1 replicate was used.

Sequencing depth

Each sample has &gt;20 M 150-paired end reads.

Antibodies

Antibodies used for both ChIP-seq and HiChIP: Anti-Androgen Receptor antibody (0.1 µg/µL, Abcam, ab133273), Anti-FOXA1 antibody (1 µg/µL, Abcam, ab23738), Anti-H3K27ac antibody (2.8 µg/µL, Diagenode, C15410196), Anti-H3K4me3 antibody (1.3 µg/µL, Diagenode, C15410003).

Peak calling parameters

ChiLin pipeline was utilized to call peaks (<https://github.com/cfce/chilin>).

Data quality

The quality metrics are described in the methods section of the manuscript.

Software

Software listed above, and described in the methods section of the manuscript.
